# Supplementary material for: Two predictive precision medicine tools for hepatocellular carcinoma
Source: PubMed Central journal article supplement (PMC6854692; doi:10.1186/s12935-019-1002-z), 2019-11-14

# Volcano

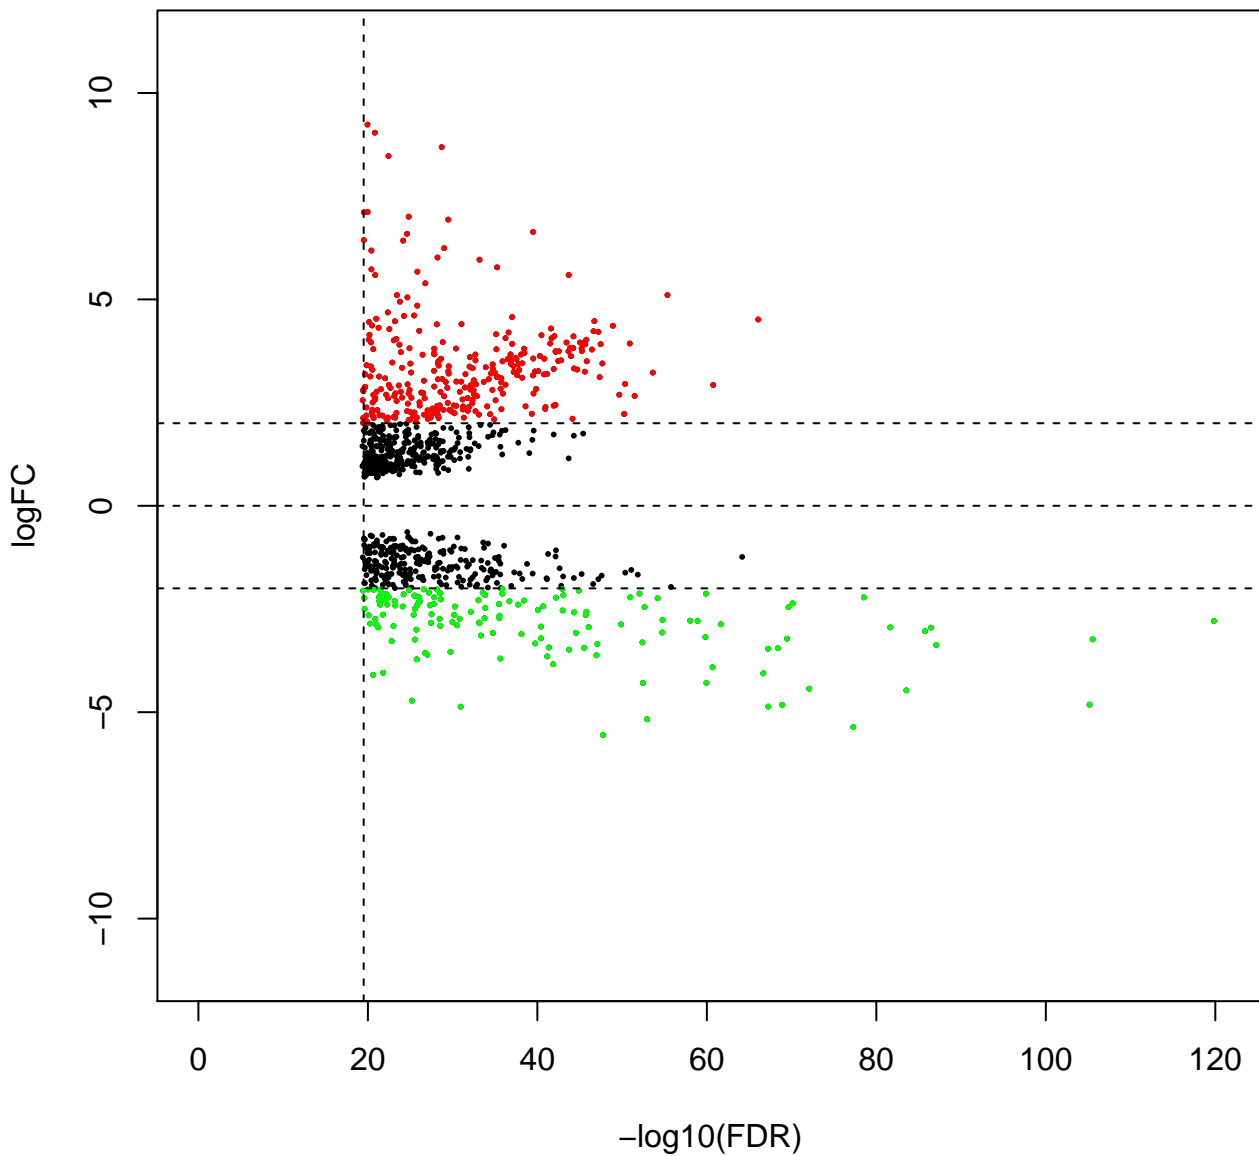

Supplement: 12935_2019_1002_MOESM3_ESM.pdf [file 12935_2019_1002_MOESM3_ESM.pdf]
