# Supplementary material for: Two predictive precision medicine tools for hepatocellular carcinoma
Source: Springer Nature journal article supplement (doi:10.1186/s12935-019-1002-z), 2019-11-14

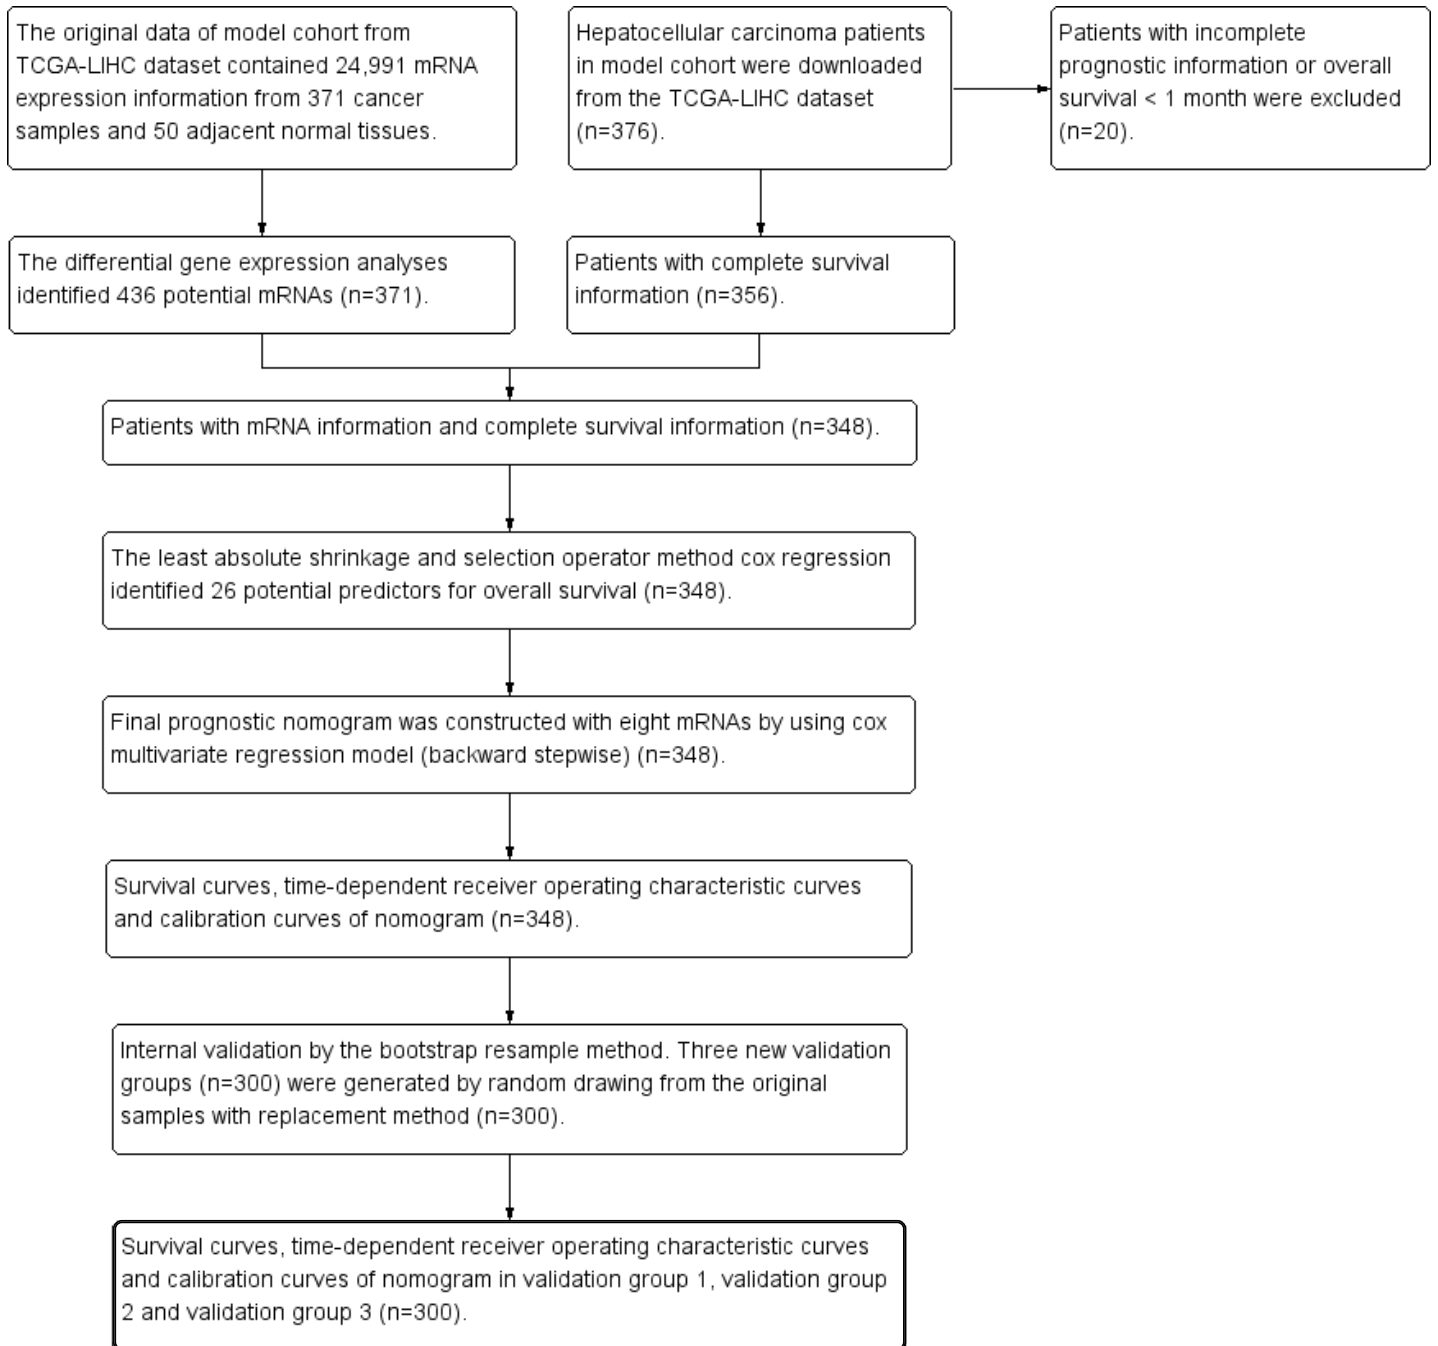

Supplement: MOESM1 [file 17388618]
